# Supplementary material for: The Effect of Dune Age and Microtopography on Triadica sebifera (Chinese tallow tree) Recovery from Hurricane Disturbance
Source: Research Square preprint supplement (doi:10.21203/rs.3.rs-7794351/v1), 2025-11-10
Supplement: Supplementary file 1 [file 0f9959e148ad7cc7f02b973d.pdf]

Article Title: The Effect of Dune Age and Microtopography on *Triadica sebifera* (Chinese tallow tree) Recovery from Hurricane Disturbance

Journal Title: Plant Ecology

Authors: Jonathan P. Evans<sup>1\*</sup>, George Burruss<sup>1</sup>, and J.T. Michel<sup>1</sup>

Affiliation: <sup>1</sup>Sewanee: The University of the South, Department of Biology

\*Corresponding Author: [jon.evans@sewanee.edu](mailto:jon.evans@sewanee.edu)

**Table 3** Analysis of deviance (Type III Wald  $\chi^2$  tests) for negative binomial GLMMs testing the effects of year and dune age and their interaction on adult *Triadica sebifera* stem counts

|                  | $\chi^2$ | df | p-value  |
|------------------|----------|----|----------|
| Year             | 6.3622   | 2  | 0.04154* |
| Dune age         | 5.3287   | 2  | 0.06964  |
| Year by Dune age | 12.502   | 4  | 0.01398* |
