# Supplementary material for: The Effect of Dune Age and Microtopography on Triadica sebifera (Chinese tallow tree) Recovery from Hurricane Disturbance
Source: Research Square preprint supplement (doi:10.21203/rs.3.rs-7794351/v1), 2025-11-10
Supplement: Supplementary file 2 [file 1ad319c14a53824128da3434.pdf]

Article Title: The Effect of Dune Age and Microtopography on *Triadica sebifera* (Chinese tallow tree) Recovery from Hurricane Disturbance

Journal Title: Plant Ecology

Authors: Jonathan P. Evans<sup>1\*</sup>, George Burruss<sup>1</sup>, and J.T. Michel<sup>1</sup>

Affiliation: <sup>1</sup>Sewanee: The University of the South, Department of Biology

\*Corresponding Author: [jon.evans@sewanee.edu](mailto:jon.evans@sewanee.edu)

**Table 1** Analysis of deviance (Type III Wald  $\chi^2$  tests) for negative binomial GLMMs testing the effects of year and microtopography and their interaction on adult *Triadica sebifera* stem counts

|                         | $\chi^2$ | df | p-value   |
|-------------------------|----------|----|-----------|
| Year                    | 44.343   | 2  | <0.001*** |
| Microtopography         | 27.873   | 2  | <0.001*** |
| Year by Microtopography | 31.998   | 4  | <0.001*** |
